# Supplementary material
Source: PubMed Central journal article supplement (PMC5102497)
Supplement: i1552-5783-56-10-6144-s03.pdf [file i1552-5783-56-10-6144-s03.pdf]

**Supplemental Table 1. Primers' sequences for real-time PCR.**

(real-time PCR running condition: 95°C for 30 sec followed 45 cycles of 95°C for 10 sec and 58°C for 20 sec)

| Gene    | Forward Primer           | Reverse Primer          |
|---------|--------------------------|-------------------------|
| capn6   | 5'-TGGGCAACATTAGCAACCAC  | 5'-GGAATCGCCTTTGTCCAGTG |
| aspn    | 5'-TCCCGAAAGGACTACCACCA  | 5'-TGTTTCCAAGACCCAGCCTC |
| gad1    | 5'-CCTAAAGTACGGGGTTCGCA  | 5'-ACTCCCTCATGTCTGATGGC |
| aqp1    | 5'-AGCGACTTTACAGACCGCAT  | 5'-TTTGGGCTTCATCTCCACCC |
| mmp10   | 5'-AGGCACTTCTGGCGTAGAAC  | 5'-TTCATTTCTCGGACTGCC   |
| mmp3    | 5'-TCTGGGCTATCCGAGGTCAT  | 5'-TGCATCGATCTTCTGGACGG |
| tnc     | 5'-CAGCTACCGACGGGATCTTC  | 5'-TGCTGGGAGCAATTCCAGAG |
| il11    | 5'-TGTGTTTGTACCTGGTCCT   | 5'-AGCTAGTTGCCGTGTGTCTG |
| il6     | 5'-AGAGACTTCCAGCCAGTTGC  | 5'-AGTCTCCTCTCCGGACTTGT |
| s100a4  | 5'-GCTCAAGGAGCTACTGACCA  | 5'-CATCATGGCAATGCAGGACA |
| s100a6  | 5'-GGAGCTGATCCAGAAGGAGC  | 5'-TAGATCAAAGCCAAGGCCCC |
| S100a11 | 5'-TCGAGTCCCTGATTGCTGTT  | 5'-TAGCTGCCCATCACTGTTGA |
| casp2   | 5'-TGTGGAAGGTGGCATCTACG  | 5'-CCAATAGCACCTCCACGACA |
| casp3   | 5'-GACTGCGGTATTGAGACAGA  | 5'-CGAGTGAGGATGTGCATGAA |
| casp7   | 5'-CAACGACACCGACGCTAATC  | 5'-GGTCCTTGCCATGCTCATT  |
| casp8   | 5'-TACGGAACGGATGGGAAGGA  | 5'-GTCTCATCAGGCACAGGCAC |
| casp9   | 5'-CGTGAACCTTCTGCCCTTCCT | 5'-TCTCCATCAAAGCCGTGACC |
| bid     | 5'-GAACTGGACCACAGCATCCA  | 5'-AGAGATGGTGCATGACTGGC |
| bcl-xl  | 5'-GGTCGCATTGTGGCCTTCTT  | 5'-CTCTCGGCTGCTGCATTGTT |
| bcl-2   | 5'-CTGAACCGGCATCTGCACAC  | 5'-GCAGGTCTGCTGACCTCACT |
| bak1    | 5'-AATGGCATCCGGACAAGGAC  | 5'-TGTTCTGCTGGTGGAGGTA  |
| bax     | 5'-GAACCATCATGGGCTGGACA  | 5'-GTGAGTGAGGCAGTGAGGAC |
| ern1    | 5'-CTTTCCTCCCAGACCCCAAT  | 5'-CATCTGAACTTCGGCATGGG |
| eif2ak3 | 5'-AGTCGGTCTTTCTCAGTGGG  | 5'-CCATGTGCAATCTGTCAGG  |
| xbp1    | 5'-AGCAGCAAGTGGTGGATTTG  | 5'-ACCTCTTCAGTAACCAGGGC |
| ddit3   | 5'-AGGAGGTCCTGTCCCTCAGAT | 5'-CTTTGGGAGGTGCTTGTGAC |
| timp1   | 5'-TAAAGCCTGTAGCTGTGCC   | 5'-AGCGTCGAATCCTTTGAGCA |
| atf3    | 5'-TTCAACATCCAGGCCAGGTC  | 5'-GGCAAAGGTGCTTGTCTGG  |
| stat3   | 5'-GCTGGAACAGCATCTTCAGG  | 5'-CTGTCTGGTCACAGACTGGT |
| c1qa    | 5'-TCTTCCAGGTGTTAGCAGGG  | 5'-GAAGATGCTGTCGGCTTCAG |
| camk4   | 5'-TCTTCCAGGTGTTAGCAGGG  | 5'-GAAGATGCTGTCGGCTTCAG |
| cyp4b1  | 5'-TGTGCTGAAGCCCTATGTGG  | 5'-GCACTTCATGAGGGTGTCCA |
| cdk1    | 5'-AGTACGGCAATCCGGGAAAT  | 5'-AACTGGCCAGGAGGGATAGA |
