# Supplementary material
Source: PubMed Central journal article supplement (PMC5102497)
Supplement: i1552-5783-56-10-6144-s04.pdf [file i1552-5783-56-10-6144-s04.pdf]

**Supplemental Table 2. Yields and RIN of Extracted RNA from RGCs**

| <b>Samples</b>   | <b>Yields (ng)</b> | <b>RIN</b> |
|------------------|--------------------|------------|
| <b>Control-1</b> | 695                | 9.2        |
| <b>ET1-1</b>     | 800                | 8.8        |
| <b>ET2-1</b>     | 775                | 8.6        |
| <b>ET3-1</b>     | 740                | 8.6        |
| <b>Control-2</b> | 520                | 7.9        |
| <b>ET1-2</b>     | 380                | 8.1        |
| <b>ET2-2</b>     | 460                | 7.9        |
| <b>ET3-2</b>     | 445                | 7.6        |
| <b>Control-3</b> | 885                | 7.7        |
| <b>ET1-3</b>     | 1010               | 7.1        |
| <b>ET2-3</b>     | 790                | 7.2        |
| <b>ET3-3</b>     | 840                | 7.0        |
