# Supplementary material
Source: PubMed Central journal article supplement (PMC5102497)
Supplement: i1552-5783-56-10-6144-s05.pdf [file i1552-5783-56-10-6144-s05.pdf]

### **Supplemental Figure 1. Immunocytochemical staining of ET<sub>A</sub> receptor and $\beta$ -tubulin III:**

Co-immunocytochemical staining of ET<sub>A</sub> receptor and  $\beta$ -tubulin III was performed in RGCs treated with vehicle, ET-1 or ET-3 for 24 hours. An enhanced staining of ET<sub>A</sub> receptor was detected in RGCs treated with ET-1 or ET-3 compared to untreated controls. The staining of ET<sub>A</sub> receptor was detected mainly in soma of RGC cells. On the other hand, ET<sub>A</sub> receptor was co-localized with  $\beta$ -tubulin III, which is a neural marker of RGCs. The result confirmed that the staining of ET<sub>A</sub> receptor was in RGCs. DIC pictures also proved the observation.

### **Supplemental Figure 2. Immunocytochemical staining of GAP-43, phosphorylated-c-Jun, Brn-3b with other neuronal markers:**

Co-immunocytochemical staining of GAP-43, p-c-Jun and  $\beta$ -tubulin III (a protein marker of neuronal cells) were paired with Neurofilament-L (a protein marker of neuronal cells), RNA-Binding Protein With Multiple Splicing (RBPMS, a protein marker of neuronal cells) and Brn-3b (high expression in RGCs) to identify the purity of the cultured RGCs. The images captured using Zeiss 510meta Confocal microscope showed that these proteins and protein markers were co-localized in soma and dendrites of RGCs. The morphology of cells was also confirmed DAPI staining and DIC images.
