# Supplementary material
Source: PubMed Central journal article supplement (PMC5102497)

**Supplemental Figure 1**

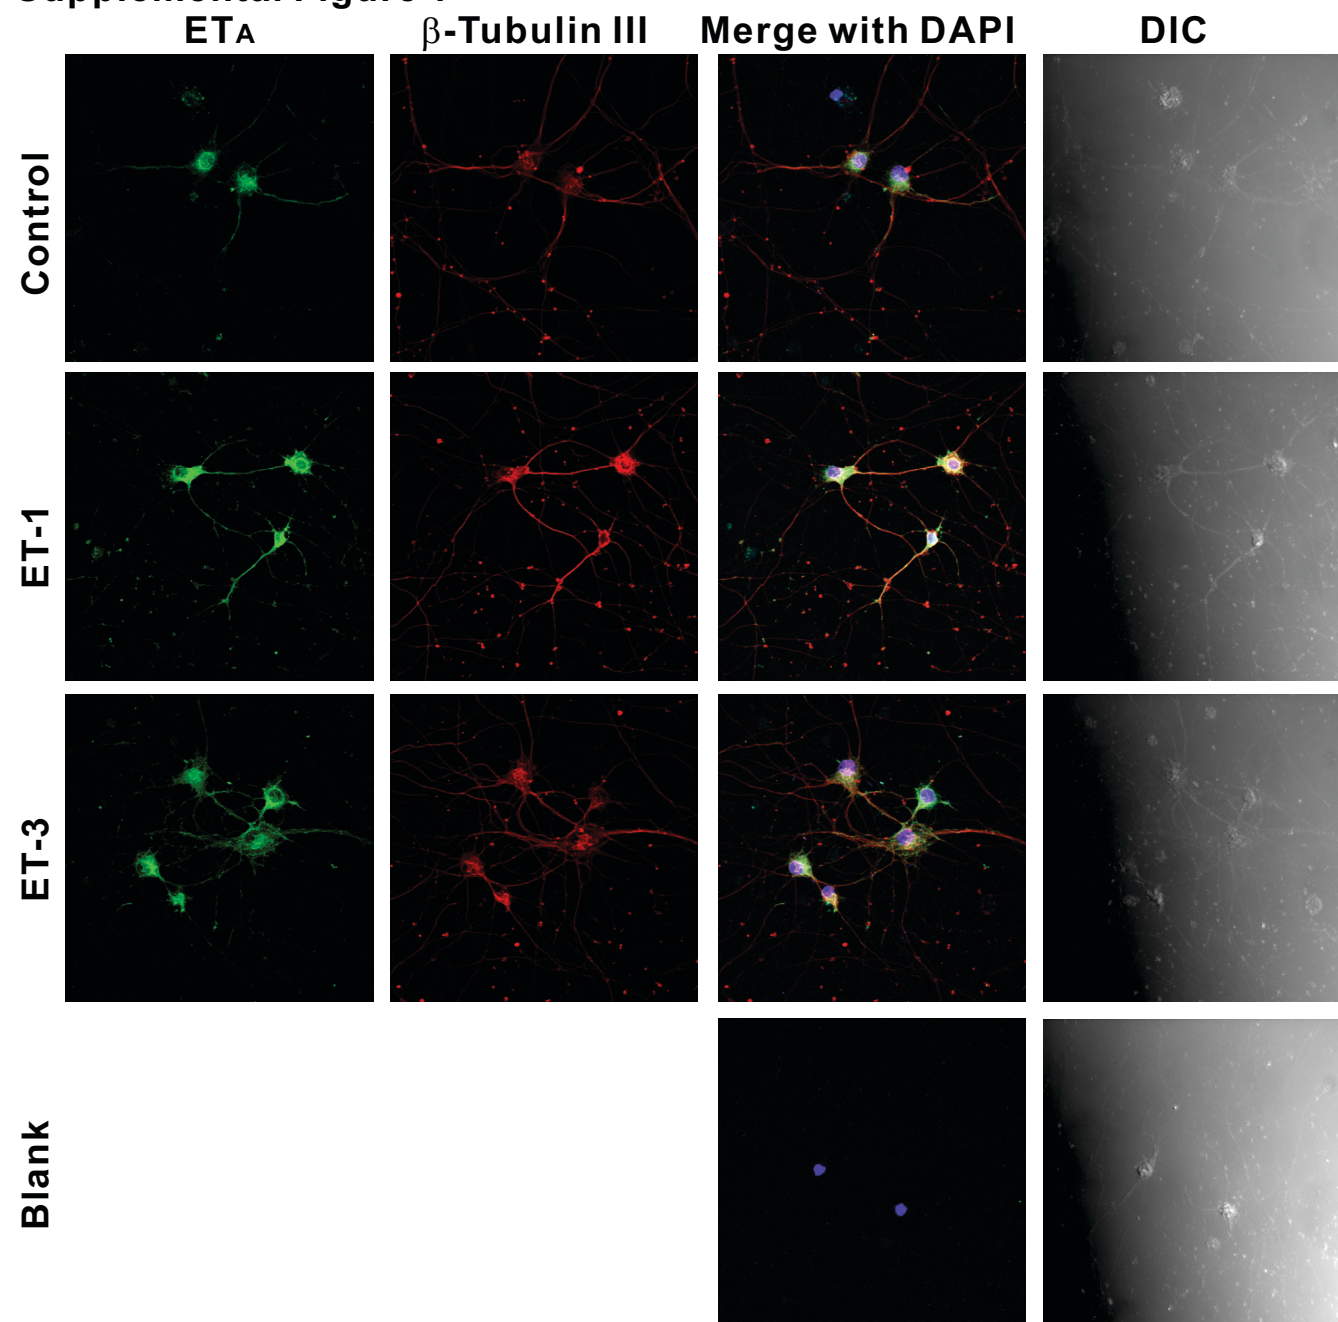

Supplement: i1552-5783-56-10-6144-s01.pdf [file i1552-5783-56-10-6144-s01.pdf]

## Supplemental Figure 2

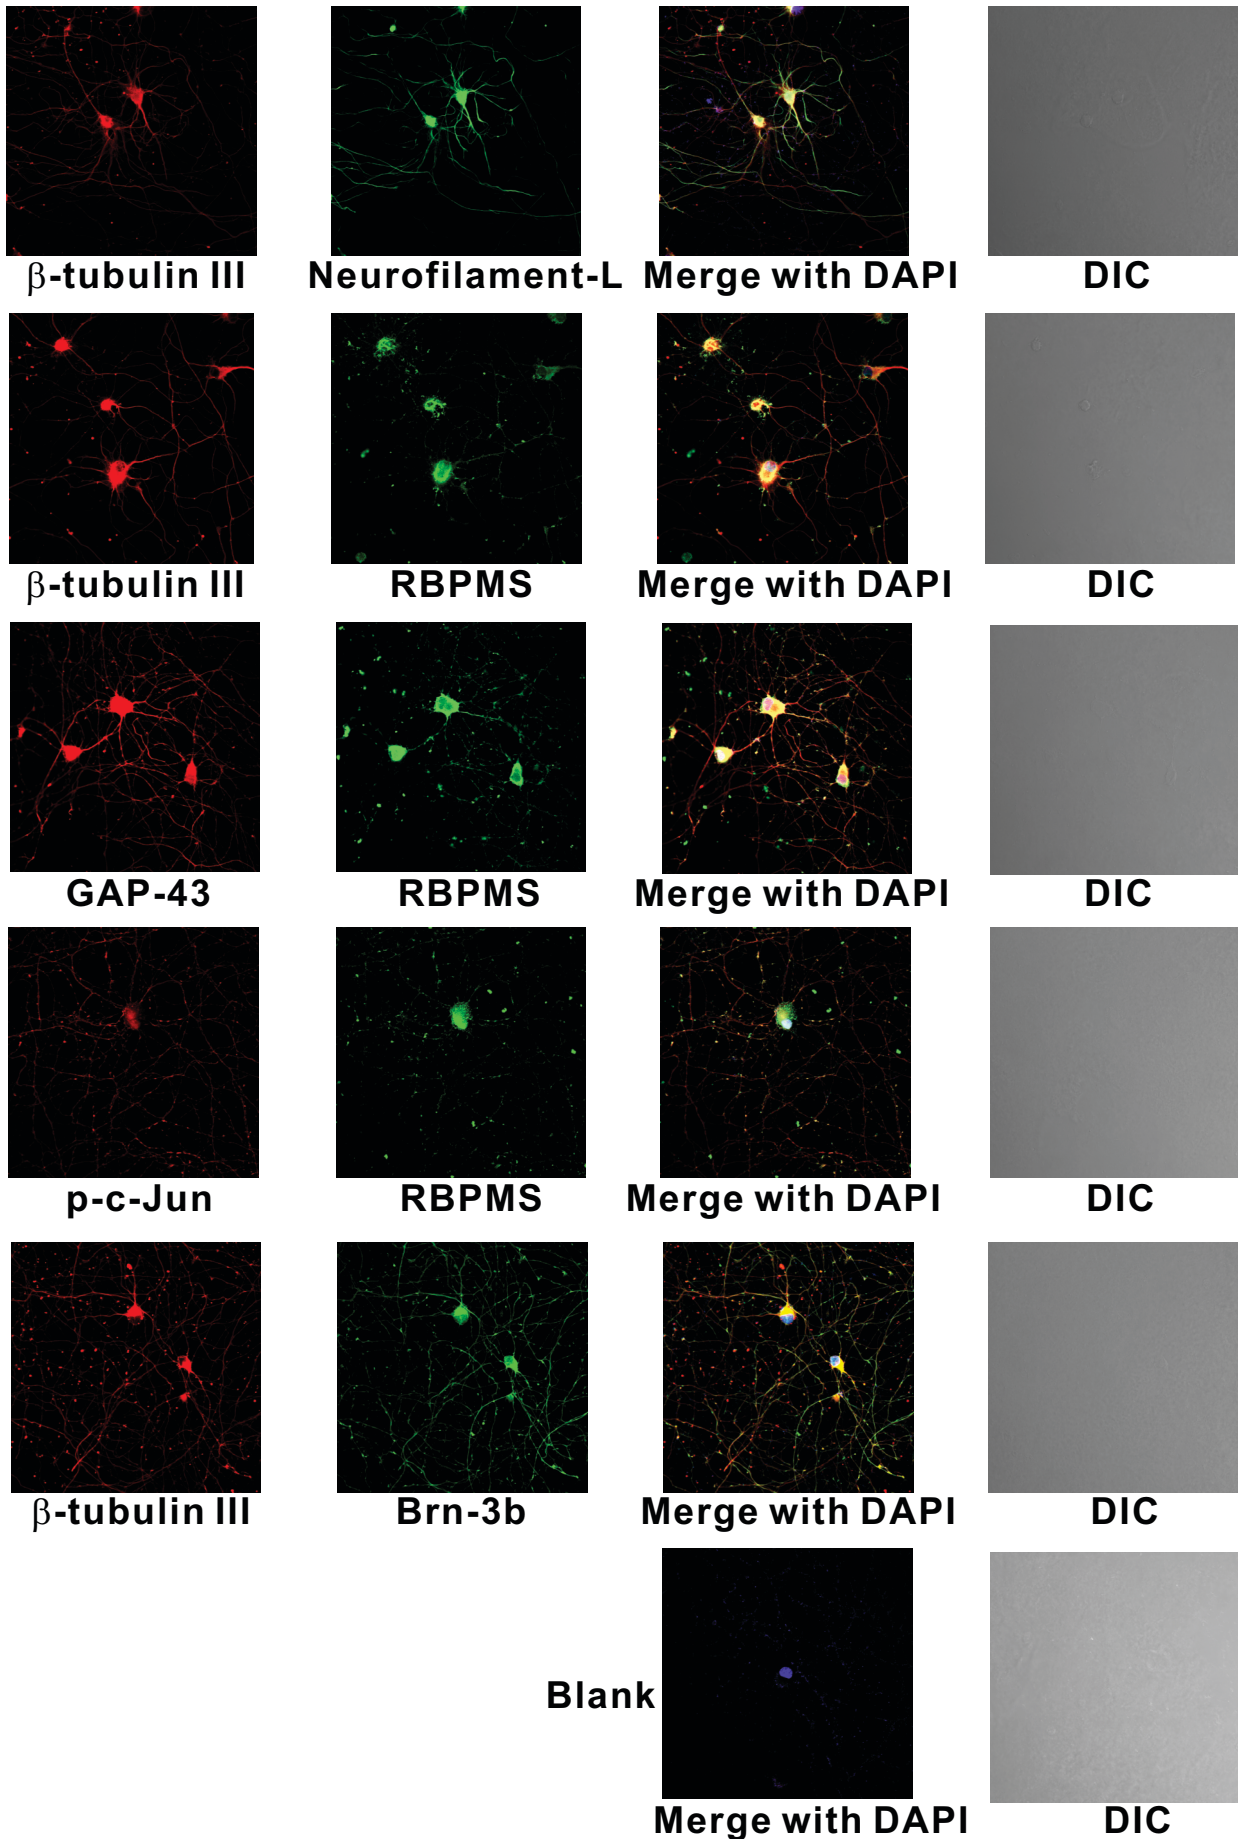

Supplement: i1552-5783-56-10-6144-s02.pdf [file i1552-5783-56-10-6144-s02.pdf]
